# Supplementary material for: Comparative functional survival and equivalent annual cost of 3 long-lasting insecticidal net (LLIN) products in Tanzania: A randomised trial with 3-year follow up
Source: PubMed Central journal article supplement (PMC7500675; doi:10.1371/journal.pmed.1003248), 2020-09-18
Supplement: pmed.1003248.s003.pdf [file pmed.1003248.s003.pdf]

## S12 STROBE Checklist

|                              | Item No | Recommendation                                                                                                                                                                                               | Location / line                                                                                                                     |
|------------------------------|---------|--------------------------------------------------------------------------------------------------------------------------------------------------------------------------------------------------------------|-------------------------------------------------------------------------------------------------------------------------------------|
| <b>Title and abstract</b>    | 1       | (a) Indicate the study's design with a commonly used term in the title or the abstract                                                                                                                       | Title                                                                                                                               |
|                              |         | (b) Provide in the abstract an informative and balanced summary of what was done and what was found                                                                                                          | Abstract                                                                                                                            |
| <b>Introduction</b>          |         |                                                                                                                                                                                                              |                                                                                                                                     |
| Background/rationale         | 2       | Explain the scientific background and rationale for the investigation being reported                                                                                                                         | Introduction                                                                                                                        |
| Objectives                   | 3       | State specific objectives, including any prespecified hypotheses                                                                                                                                             | Abstract background<br>Introduction paragraph 6<br>Table 1                                                                          |
| <b>Methods</b>               |         |                                                                                                                                                                                                              |                                                                                                                                     |
| Study design                 | 4       | Present key elements of study design early in the paper                                                                                                                                                      | Introduction paragraph 5                                                                                                            |
| Setting                      | 5       | Describe the setting, locations, and relevant dates, including periods of recruitment, exposure, follow-up, and data collection                                                                              | Figure 1<br>Methods paragraph 1<br>S1 Table                                                                                         |
| Participants                 | 6       | (a) <i>Cohort study</i> —Give the eligibility criteria, and the sources and methods of selection of participants. Describe methods of follow-up                                                              | Cohort study<br>Methods paragraph 1<br>Follow up<br>Methods paragraph 2 and 3                                                       |
|                              |         | (b) <i>Cohort study</i> —For matched studies, give matching criteria and number of exposed and unexposed                                                                                                     | NA                                                                                                                                  |
| Variables                    | 7       | Clearly define all outcomes, exposures, predictors, potential confounders, and effect modifiers. Give diagnostic criteria, if applicable                                                                     | Table 1                                                                                                                             |
| Data sources/<br>measurement | 8*      | For each variable of interest, give sources of data and details of methods of assessment (measurement). Describe comparability of assessment methods if there is more than one group                         | Table 1                                                                                                                             |
| Bias                         | 9       | Describe any efforts to address potential sources of bias                                                                                                                                                    | Blinding Methods Paragraph 1<br>Randomisation Methods Paragraph 1<br>Range of settings Methods Paragraph 1, Figure 1                |
| Study size                   | 10      | Explain how the study size was arrived at                                                                                                                                                                    | Lorenz et al 2014 [21]                                                                                                              |
| Quantitative variables       | 11      | Explain how quantitative variables were handled in the analyses. If applicable, describe which groupings were chosen and why                                                                                 | Methods statistical analysis                                                                                                        |
| Statistical methods          | 12      | (a) Describe all statistical methods, including those used to control for confounding                                                                                                                        | Methods statistical analysis                                                                                                        |
|                              |         | (b) Describe any methods used to examine subgroups and interactions                                                                                                                                          | Clustering at village level: Methods statistical analysis<br>Balance between arms: Table 2                                          |
|                              |         | (c) Explain how missing data were addressed                                                                                                                                                                  | Electronic data capture minimised missing data and data errors: Methods paragraph 2                                                 |
|                              |         | (d) <i>Cohort study</i> —If applicable, explain how loss to follow-up was addressed                                                                                                                          | Sample size was adequate as it was calculated on a 50% loss to follow up greater than that which was observed in the study Ref [21] |
|                              |         | (e) Describe any sensitivity analyses                                                                                                                                                                        | N/A                                                                                                                                 |
| <b>Results</b>               |         |                                                                                                                                                                                                              | <b>Location / line</b>                                                                                                              |
| Participants                 | 13*     | (a) Report numbers of individuals at each stage of study—eg numbers potentially eligible, examined for eligibility, confirmed eligible, included in the study, completing follow-up, and analysed            | S1 Table study flow<br>S4 Table functional survival<br>S5 Table attrition                                                           |
|                              |         | (b) Give reasons for non-participation at each stage                                                                                                                                                         | NA                                                                                                                                  |
|                              |         | (c) Consider use of a flow diagram                                                                                                                                                                           | S1 Table                                                                                                                            |
| Descriptive data             | 14*     | (a) Give characteristics of study participants (eg demographic, clinical, social) and information on exposures and potential confounders                                                                     | Table 2                                                                                                                             |
|                              |         | (b) Indicate number of participants with missing data for each variable of interest                                                                                                                          | S1 Table study flow<br>S4 Table functional survival<br>S5 Table attrition                                                           |
|                              |         | (c) <i>Cohort study</i> —Summarise follow-up time (eg, average and total amount)                                                                                                                             | S4 Table functional survival                                                                                                        |
| Outcome data                 | 15*     | <i>Cohort study</i> —Report numbers of outcome events or summary measures over time                                                                                                                          | S4 Table functional survival<br>S5 Table attrition                                                                                  |
| Main results                 | 16      | (a) Give unadjusted estimates and, if applicable, confounder-adjusted estimates and their precision (eg, 95% confidence interval). Make clear which confounders were adjusted for and why they were included | Results                                                                                                                             |
|                              |         | (b) Report category boundaries when continuous variables were categorized                                                                                                                                    | N/A                                                                                                                                 |
|                              |         | (c) If relevant, consider translating estimates of relative risk into absolute risk for a meaningful time period                                                                                             | N/A                                                                                                                                 |
| Other analyses               | 17      | Report other analyses done—eg analyses of subgroups and interactions, and sensitivity analyses                                                                                                               | N/A                                                                                                                                 |
| <b>Discussion</b>            |         |                                                                                                                                                                                                              |                                                                                                                                     |
| Key results                  | 18      | Summarise key results with reference to study objectives                                                                                                                                                     | Results                                                                                                                             |
| Limitations                  | 19      | Discuss limitations of the study, taking into account sources of potential bias or imprecision. Discuss both direction and magnitude of any potential bias                                                   | Discussion paragraph 5 & 8                                                                                                          |
| Interpretation               | 20      | Give a cautious overall interpretation of results considering objectives, limitations, multiplicity of analyses, results from similar studies, and other relevant evidence                                   | Results                                                                                                                             |
| Generalisability             | 21      | Discuss the generalisability (external validity) of the study results                                                                                                                                        | Discussion                                                                                                                          |
| <b>Other information</b>     |         |                                                                                                                                                                                                              |                                                                                                                                     |
| Funding                      | 22      | Give the source of funding and the role of the funders for the present study and, if applicable, for the original study on which the present article is based                                                | Funding                                                                                                                             |
