# Supplementary material for: Comparative functional survival and equivalent annual cost of 3 long-lasting insecticidal net (LLIN) products in Tanzania: A randomised trial with 3-year follow up
Source: PubMed Central journal article supplement (PMC7500675; doi:10.1371/journal.pmed.1003248), 2020-09-18
Supplement: pmed.1003248.s004.pdf [file pmed.1003248.s004.pdf]

**S1 Table**

**Study Flow.** The number of interviews completed each year, loss to follow up and the number of study nets evaluated for each durability component is shown.

|                                                       | <b>2014 (Year 1)</b>                 | <b>2015 (Year 2)</b>                 | <b>2016 (Year 3)</b>                 |
|-------------------------------------------------------|--------------------------------------|--------------------------------------|--------------------------------------|
| <b>Households interviewed</b>                         | <b>87.2%</b><br><b>(2,962/3,398)</b> | <b>95.7%</b><br><b>(2,834/2,962)</b> | <b>96.3%</b><br><b>(2,730/2,834)</b> |
| <b>Household loss to follow up</b>                    | <b>12.8%</b><br><b>(436/3,398)</b>   | <b>4.3%</b><br><b>(128/2,962)</b>    | <b>3.7%</b><br><b>(104/2,834)</b>    |
| <b>Study nets loss to follow up</b>                   | <b>8.3%</b><br><b>(880/10,598)</b>   | <b>7.2%</b><br><b>(539/7,477)</b>    | <b>10.4%</b><br><b>(551/5,311)</b>   |
| <b>Nets lost from households</b>                      | <b>23.1%</b><br><b>(2,241/9,726)</b> | <b>23.5%</b><br><b>(1,627/6,938)</b> | <b>39.0%</b><br><b>(1,855/4,760)</b> |
| <b>Nets inspected for holes</b>                       | <b>82.5%</b><br><b>(6,166/7,477)</b> | <b>90.1%</b><br><b>(4,783/5,311)</b> | <b>86.7%</b><br><b>(2,519/2,905)</b> |
| <b>Nets evaluated by Ifakara Ambient Chamber Test</b> | <b>142</b>                           | <b>144</b>                           | <b>140</b>                           |
| <b>Nets evaluated for bio efficacy</b>                | <b>142</b>                           | <b>144</b>                           | <b>140</b>                           |
| <b>Nets evaluated for chemical content</b>            | <b>144</b>                           | <b>144</b>                           | <b>144</b>                           |
