# Supplementary material for: Comparative functional survival and equivalent annual cost of 3 long-lasting insecticidal net (LLIN) products in Tanzania: A randomised trial with 3-year follow up
Source: PLoS Med. 2020 Sep 18;17(9):e1003248. doi: 10.1371/journal.pmed.1003248 (PMC7500675; doi:10.1371/journal.pmed.1003248)
Supplement: S7 Table — (PDF) [file pmed.1003248.s010.pdf]

**S7 Table**

**I-ACT (Ifakara Ambient Chamber Test) results on mosquito mortality and blood feeding inhibition by net product and time point in months.** Data from the I-ACT test were analysed by binary logistic regression and the Odds Ratio (OR) and 95% confidence interval (95% CI) of the Odds Ratio are shown with Olyset as the reference net; percentages of net products meeting optimal WHO bio efficacy criteria in the I-ACT by time point in months. 95% confidence intervals in parenthesis and compared with a  $\chi^2$  test. Numbers passing / numbers tested in square brackets [n/N]†.

|                        | % (n/N) Mosquito Mortality |                       |                      | % (n/N) Mosquito Blood feeding Inhibition |                       |                      | % (CI) [n/N] Nets meeting WHO bio efficacy criteria |                             |                           |
|------------------------|----------------------------|-----------------------|----------------------|-------------------------------------------|-----------------------|----------------------|-----------------------------------------------------|-----------------------------|---------------------------|
| Months                 | 10                         | 22                    | 36                   | 10                                        | 22                    | 36                   | 10                                                  | 22                          | 36                        |
| <b>Olyset</b>          | 87%<br>(2355/2700)         | 69%<br>(1895/2880)    | 70%<br>(2009/2880)   | 99.7%<br>(2691/2700)                      | 98.1%<br>(2826/2880)  | 93.1%<br>(2682/2880) | 100%<br>(92,100)<br>[49/49]                         | 96%<br>(86,99)<br>[46/48]   | 88%<br>(75,95)<br>[42/48] |
| <b>OR<br/>(95% CI)</b> | 1                          | 1                     | 1                    | 1                                         | 1                     | 1                    |                                                     |                             |                           |
| <b>PermaNet</b>        | 98%<br>(2686/2730)         | 91%<br>(2635/2880)    | 88%<br>(2530/2880)   | 99.6%<br>(2719/2730)                      | 98.8%<br>(2845/2880)  | 96.5%<br>(2779/2880) | 100%<br>(93, 100)<br>[48/48]                        | 98%<br>(89,100)<br>[47/48]  | 96%<br>(86,99)<br>[46/48] |
| <b>OR<br/>(95% CI)</b> | 6.4<br>(3.73-11.11)        | 4.09<br>(2.77-6.04)   | 2.16<br>(1.21-3.85)  | 1.50<br>(0.36-6.22)                       | 1.01<br>(0.44-2.34)   | 1.88<br>(0.88-3.99)  |                                                     |                             |                           |
| <b>NetProtect</b>      | 99%<br>(2705/2730)         | 96%<br>(2764/2880)    | 94.1%<br>(2711/2880) | 99.9%<br>(2726/2730)                      | 99.9%<br>(2876/2880)  | 94.1%<br>(2711/2880) | 100%<br>(92, 100)<br>[47,47]                        | 100%<br>(92,100)<br>[48/48] | 92%<br>(80,98)<br>[44/48] |
| <b>OR<br/>(95% CI)</b> | 14.7<br>(7.87-27.34)       | 12.82<br>(7.52-21.86) | 3.43<br>(2.33-5.06)  | 1.87<br>(0.40-8.84)                       | 12.70<br>(1.97-81.75) | 0.94<br>(0.48-1.82)  |                                                     |                             |                           |
| <b>p-value*</b>        | <0.001                     | <0.001                | <0.001               | 0.697                                     | 0.026                 | 0.200                | -                                                   | 0.360                       | 0.336                     |

† WHO optimal insecticide effectiveness criteria of  $\geq 80\%$  24-hour mortality or  $\geq 90\%$  blood feeding inhibition were used.

\*p-value for the comparison between the three nets. The p-values for differences in mosquito mortality between PermaNet and NetProtect were 0.024, <0.001, and 0.143 at 10, 22 and 36 months, respectively.
